# Supplementary material
Source: publisher figshare collection journal article supplement (https://frontiersin.figshare.com/ndownloader/files/24262526)
Supplement: Supplementary file [file 24262526]

## **Supplementary Information for**

### **Annexin A7 regulates endometrial receptivity**

Md Alauddin<sup>1</sup>, Madhuri S Salker<sup>1\*</sup>, Anja Umbach<sup>2</sup>, Janet Rajaxavier<sup>1</sup>, Toshiyuki Okumura<sup>1,3</sup>,  
Yogesh Singh<sup>4</sup>, Anna Wagner<sup>1</sup>, Sara Y Brucker<sup>1</sup>, Diethelm Wallwiener<sup>1</sup>,  
Jan J Brosens<sup>5,6</sup> and Florian Lang<sup>2\*</sup>

<sup>1</sup>Department of Women's Health, Eberhard-Karls University Tuebingen, Calwerstr 7, 72076 Tuebingen, Germany.

<sup>2</sup>Department of Physiology, Eberhard-Karls University Tuebingen, Wilhelmstr 56, D-72076 Tuebingen, Germany.

<sup>3</sup>Department of Obstetrics and Gynecology, Juntendo University School of Medicine, Tokyo, Japan

<sup>4</sup>Institute for Medical Genetics and Applied Genomics, Eberhard-Karls University Tuebingen, Calwerstr 7, 72076 Tuebingen, Germany.

<sup>5</sup>Division of Biomedical Sciences, Warwick Medical School, CV2 2DX Coventry, United Kingdom.

<sup>6</sup>Tommy's National Centre for Miscarriage Research, University Hospitals Coventry and Warwickshire NHS Trust, Clifford Bridge Rd, Coventry CV2 2DX, United Kingdom

#### **This PDF file includes:**

Tables S1 & S2

Figures S1 –S6

Supplementary Method 1

**Table S1: Patient demographics and characteristics (Figure 4d -RNA-seq).**

|                      | Age         | Live Birth | Number of Losses | BMI          | LH+ Day    |
|----------------------|-------------|------------|------------------|--------------|------------|
| <b>Sub fertility</b> | 36.6 ± 1.36 | 0          | 0                | 24.6 ± 1.42  | 7.2 ± 0.13 |
| <b>RPL</b>           | 37.5 ± 0.79 | 0.3± 0.15  | 4.9 ± 0.52       | 25.44 ± 1.02 | 7.9 ± 0.45 |

Data shown are arithmetic means ± SEM (n = 10 in each group)

Sub fertility; unexplained = 5; male factor = 2; tubal disease = 1; endometriosis = 1; polycystic ovary syndrome = 1.

RPL; Recurrent Pregnancy Loss

BMI; Body Mass Index

LH+; days after the luteinizing hormone peak

**Table S2: Patient demographics and characteristics (Figure 4e -Western blot).**

|                      | Age         | Live Birth | Number of Losses | BMI         | LH+ Day    |
|----------------------|-------------|------------|------------------|-------------|------------|
| <b>Sub fertility</b> | 35.2 ± 2.68 | 0          | 0                | 22.4 ± 2.07 | 9 ± 0.70   |
| <b>RPL</b>           | 36.4± 3.28  | 0          | 4± 1.22          | 24.5± 3.10  | 8.2 ± 1.30 |

Data shown are arithmetic means ± SEM (n = 10 in each group)

Sub fertility; Unexplained = 10

RPL; Recurrent Pregnancy Loss = 10

BMI; Body Mass Index

LH+; days after the luteinizing hormone peak

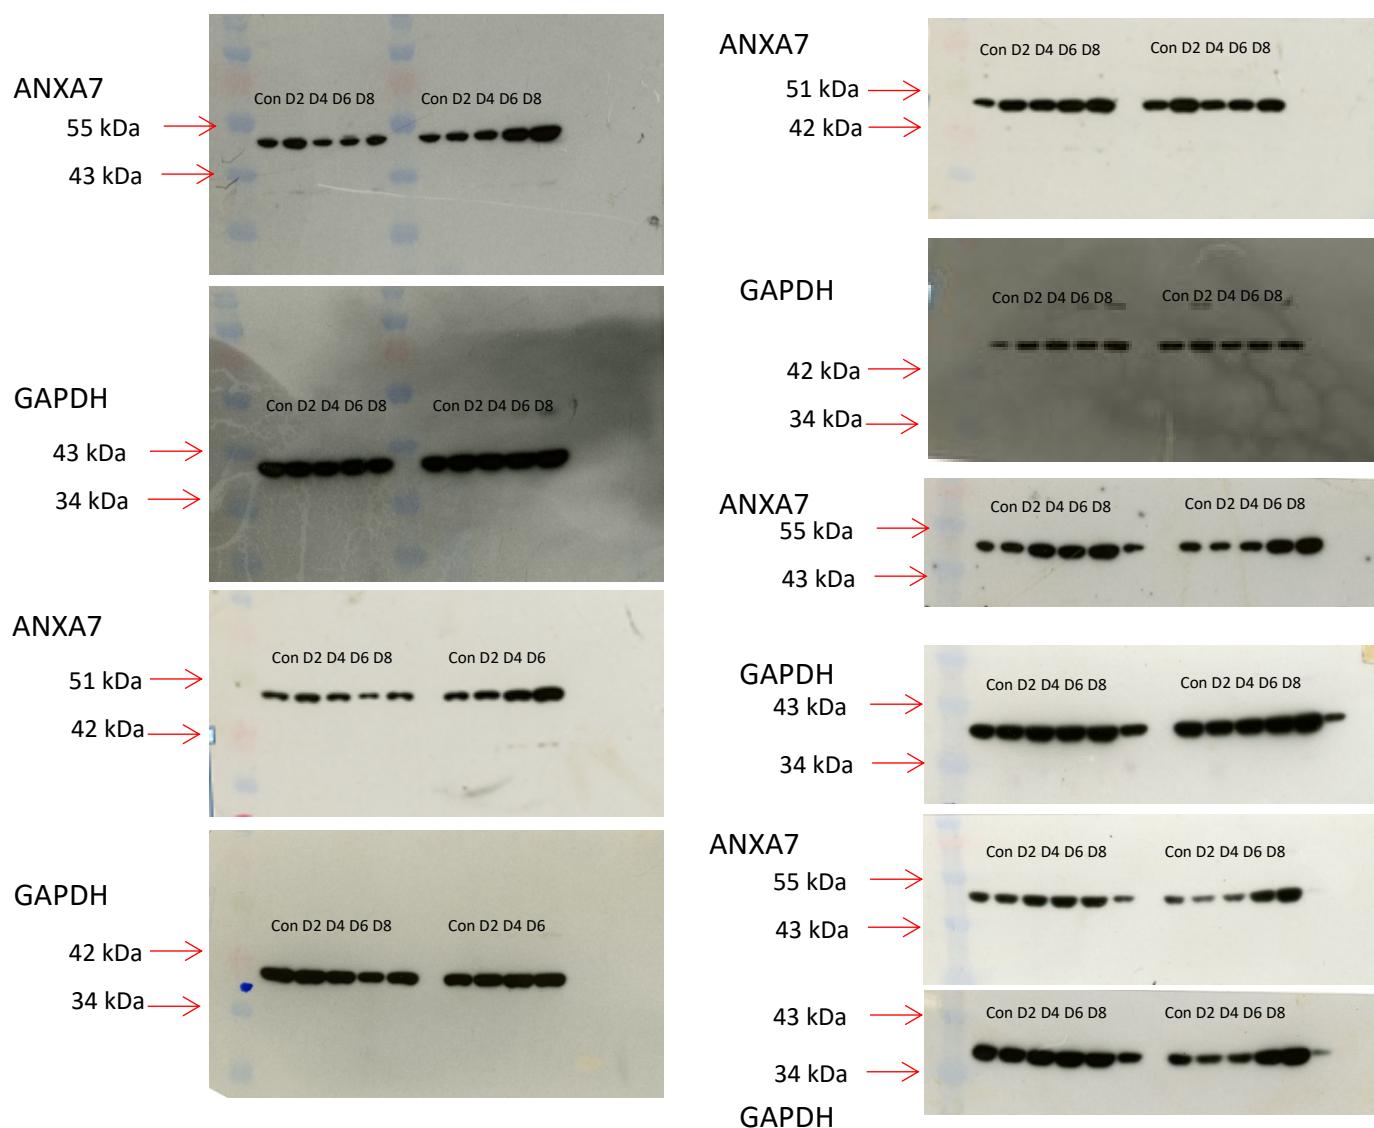

**Figure Sup 1: ANXA7 level in Human Endometrial Stromal Cells (HESCs).**

Original Western blot of ANXA7 (51 kDa approx.) and GAPDH (37 kDa) as shown in Figure 1c (n = 10).

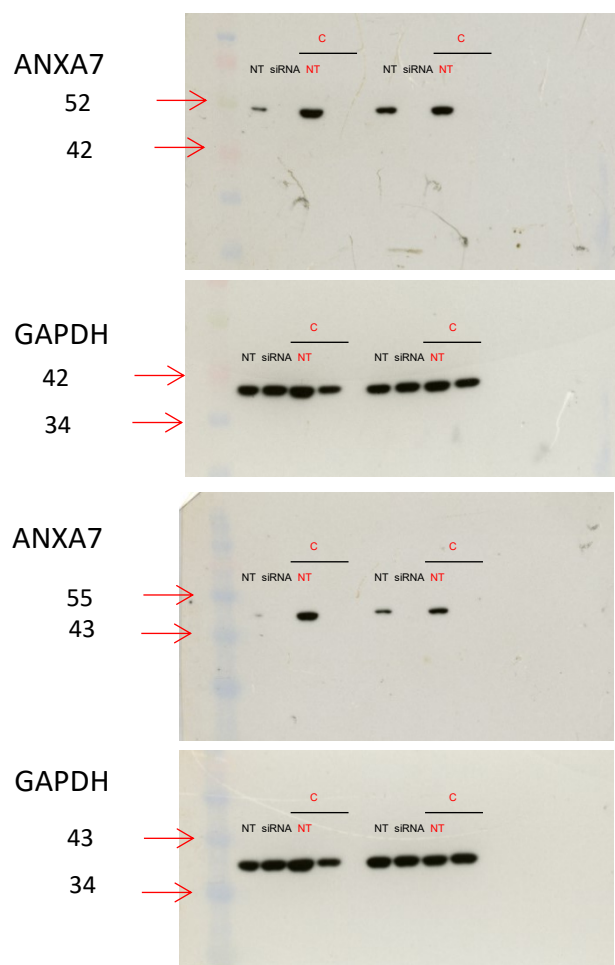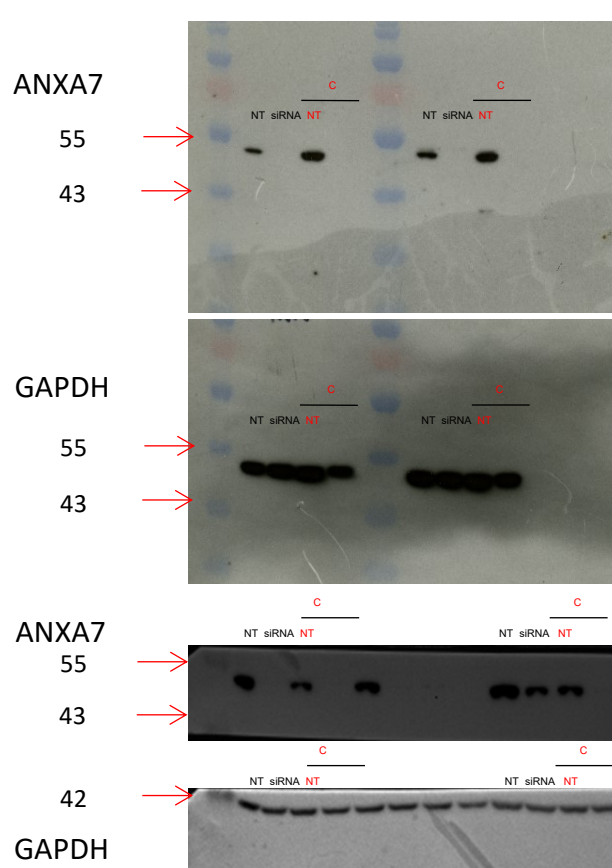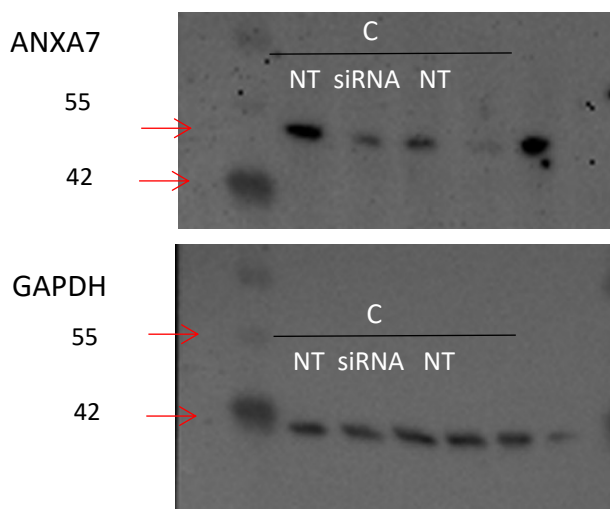

**Figure Sup 2: ANXA7 Knockdown in HESCs.**

Original Western blot of ANXA7 and GAPDH as shown in Figure 2b (n = 10).

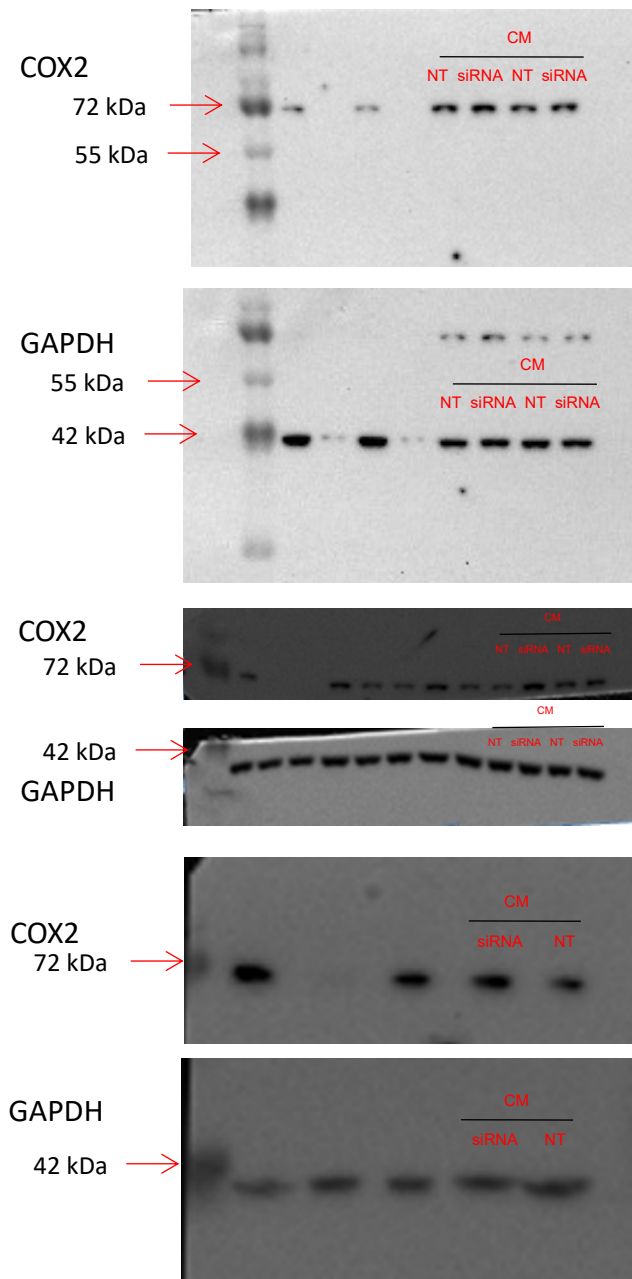

**Figure Sup 3: COX2 level in ANXA7 Knockdown HESCs.**

Original Western blot of Cox2 and GAPDH as shown in Figure 3b (n = 5).

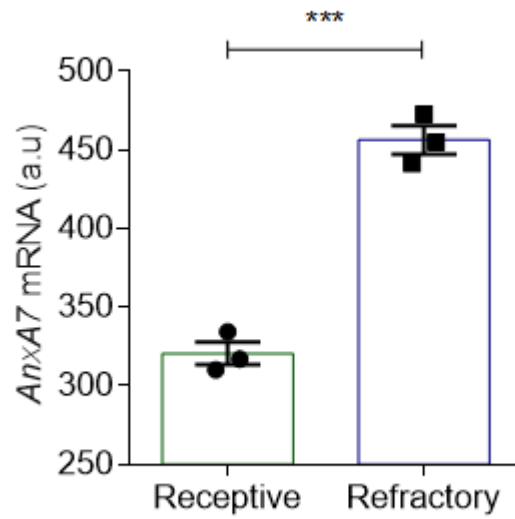

**Figure Sup 4: Endometrial AnxA7 transcripts during the mouse implantation window.**

Comparison of endometrial AnxA7 transcripts during the mouse implantation window. Transcript levels are expressed as arbitrary units (a.u). The data were derived from *in silico* analysis of publicly available microarray data [Gene Expression Omnibus (GEO) Profiles; ID: GSE44451]. (n = 3), \*\*\*P<0.0001 using Student's t-test.

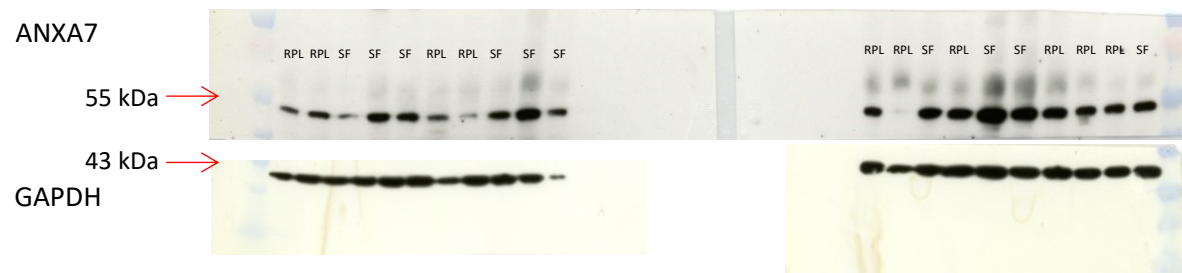

**Figure Sup 5: Infertility is associated with reduced endometrial ANXA7**

Original Western blot of ANXA7 expression in mid-luteal endometrial biopsies from Subfertile (SF; n = 10) and recurrent pregnancy loss patients (RPL; n = 10).

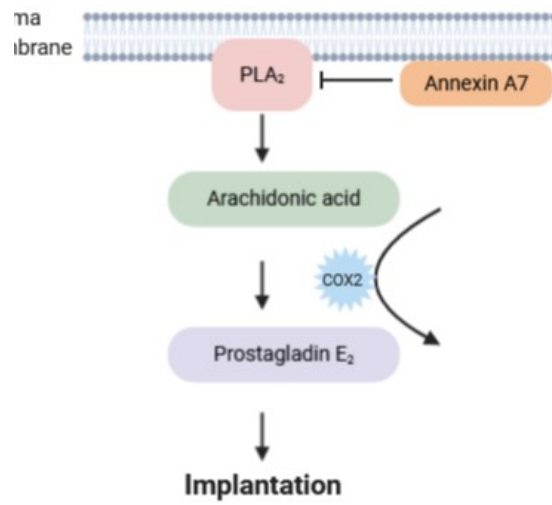

**Figure S6: ANXA7 regulates embryo implantation**

PLA<sub>2</sub> generates arachidonic acid (AA) from phospholipids. AA can then generate prostaglandin E<sub>2</sub> by the enzymatic activity of COX2. Here we show that the Annexin A7 inhibits the PLA<sub>2</sub> activity and subsequently prevents implantation.



## Supplementary Method 1

Homo sapiens *ANNEXIN A7 (ANXA7)*, transcript variant 2, mRNA

NCBI Reference Sequence: NM\_004034.4

ORIGIN

```
1 atcttgctggg agaccgggtt gggctgtgac gctgctgctg gggtcagaat gtcataccca
61 ggctatcccc caacaggcta cccacctttc cctggatata ctctgcagg tcaggagtca
121 tctttcccc cttctggta gtatcctat cctagtggct ttctccaat gggaggaggt
181 gcctaccac aagtccaag tagtggctac ccaggagctg gaggctacc tgcgcctgga
241 ggftatocag cccctggagg ctatcctggt gcccacagc cagggggagc tccatctat
```

Product length 71bp

F: 5'CTG CTG GGG TCA GAA TGT CAT A 3'  
R: 3'AGG AGG ATA TCC AGG GAA AGG T 5'
